# Supplementary material for: A convenient fluorescent nanoplatform relying on N,B-doped carbon dots to achieve highly selective sensing of dichromate
Source: Royal Society of Chemistry journal article supplement (doi:10.1039/d4nj05027d), 2025-01-01
Supplement: d4nj05027d1.pdf [file d4nj05027d1.pdf]

## Supplementary Information

### **A convenient fluorescent nanoplatform relying on N,B-doped carbon dots to achieve highly selective sensing of dichromate**

Chunxiao Cui, Linlin Wang\* and Xue-Bo Yin\*

Institute for Frontier Medical Technology, College of Chemistry and Chemical Engineering,  
Shanghai University of Engineering Science, Shanghai 201620, China

\*E-mail: wanglinlin@sues.edu.cn; xbyin@nankai.edu.cn

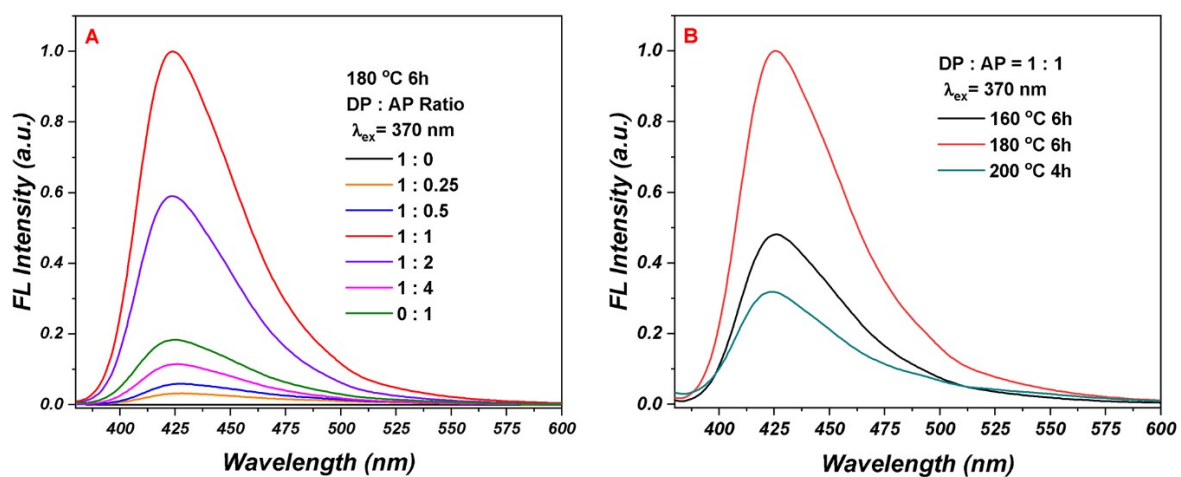

**Figure S1.** (A) The precursor ratios, and (B) the reaction temperature and time were optimized to observe the highest fluorescence for APDP-CDs. [obtained-CDs] = 0.039 mg/mL,  $\lambda_{\text{ex}} = 370$  nm.

## Calculation of the quantum yields

The fluorescence quantum yields (QYs) of the obtained APDP-CDs were determined by a relative method according to previous reports using quinine sulfate (QS) in 0.1 M H<sub>2</sub>SO<sub>4</sub> ( $\Phi_r = 54\%$ ) as the reference [27, 29]. The QYs value of the sample was calculated using the following equation:

$$\begin{aligned}\Phi_s &= \Phi_r \cdot (I_s/A_s) \cdot (A_r/I_r) \cdot (\eta_s/\eta_r)^2 \\ &= \Phi_r \cdot (K_s / K_r) \cdot (\eta_s / \eta_r)^2\end{aligned}\quad (S1)$$

Where  $\Phi$  is the relative quantum yields and  $\eta$  is the refractive index of the solvent. K is the slope determined by the curves. The subscript "r" refers to the reference, quinine sulfate dye dissolved in 0.1M H<sub>2</sub>SO<sub>4</sub> with quantum yields (54%), and "s" for the sample. For the aqueous solutions, the refractive index  $\eta_s = \eta_r = 1.33$ . To get more reliable results, the optical density of the sample was kept value were between 0 – 0.06 to minimize the inner-filter effects at the excitation wavelength. The fluorescence spectra were recorded and then integrated of intensity. Figure S4 (Supplementary Information) summarizes the QYs of quinine sulfate and the obtained APDP-CDs, respectively.

|              | Quinine sulfate (QS) |       |       |       |       | APDP-CDs |       |       |       |       |
|--------------|----------------------|-------|-------|-------|-------|----------|-------|-------|-------|-------|
| Abs.         | 0.010                | 0.020 | 0.031 | 0.041 | 0.050 | 0.010    | 0.021 | 0.030 | 0.040 | 0.051 |
| Integrated   | 1467                 | 2251  | 2821  | 3507  | 4199  | 5194     | 1074  | 1520  | 1985  | 24010 |
| fluorescence | 74.11                | 16.41 | 55.18 | 94.57 | 83.88 | 2.35     | 21.56 | 15.24 | 50.73 | 9.62  |
| Slope        | 6643162              |       |       |       |       | 4624121  |       |       |       |       |
| QYs (%)      | 54                   |       |       |       |       | 37.59    |       |       |       |       |

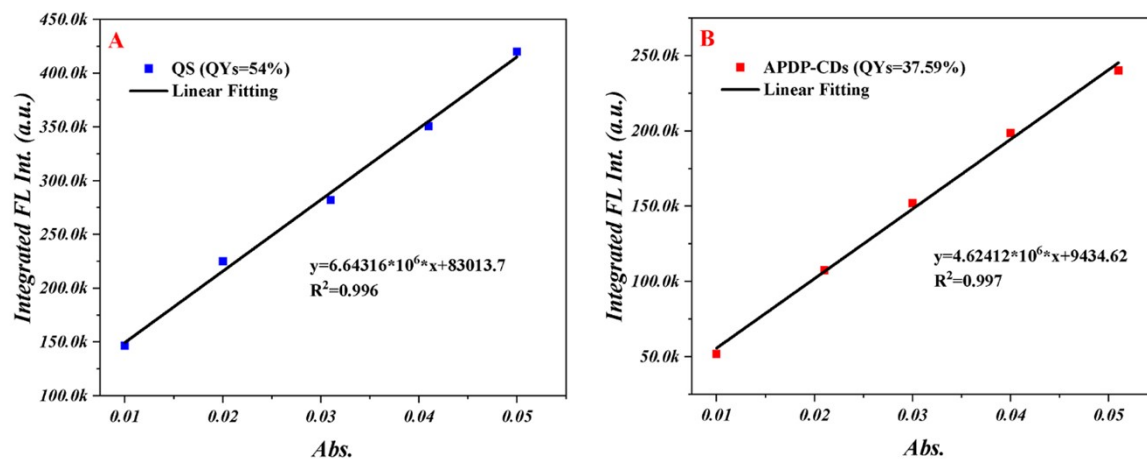

**Figure S2.** Plots integrated fluorescence intensity of quinine sulfate (QS, the reference) and APDP-CDs as a function of optical absorbance at 360 nm and relevant data.

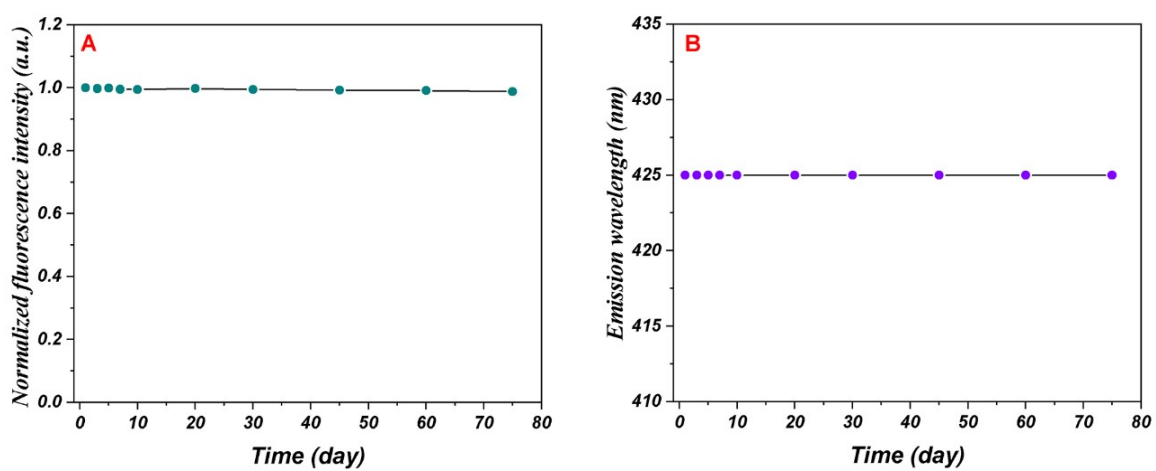

**Figure S3.** Stability of the as-prepared APDP-CDs with respect to (A) fluorescence emission intensity at 425 nm, and (B) emission wavelength with the maximum intensity,  $\lambda_{\text{ex}} = 370$  nm, [APDP-CDs] = 0.039 mg/mL.

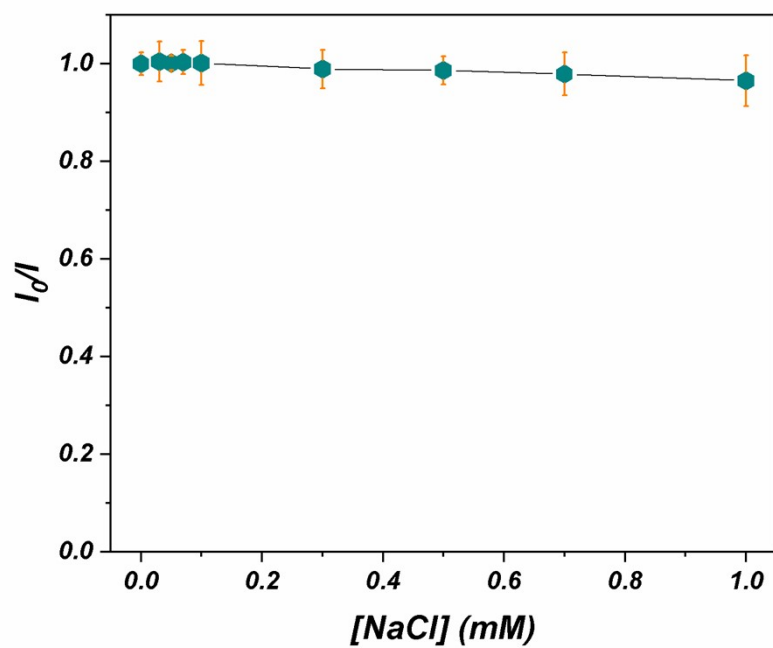

**Figure S4.** The relative fluorescence emission intensity of APDP-CDs in the presence of different concentrations of NaCl solutions.  $[APDP-CDs] = 0.039 \text{ mg/mL}$ ,  $\lambda_{ex} = 370 \text{ nm}$ .

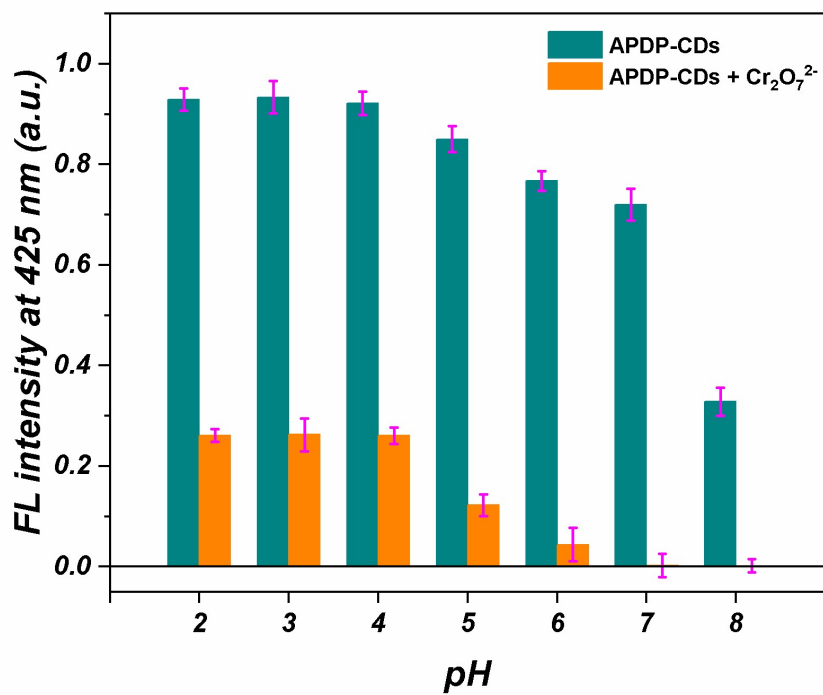

**Figure S5.** Bar diagram showing the influence of pH on the FL intensity at 425 nm of APDP-CDs in the absence and presence of 1 mM Cr<sub>2</sub>O<sub>7</sub><sup>2-</sup> in various pH solutions. Determination conditions: [APDP-CDs] = 0.039 mg/mL and  $\lambda_{\text{ex}} = 370$  nm.

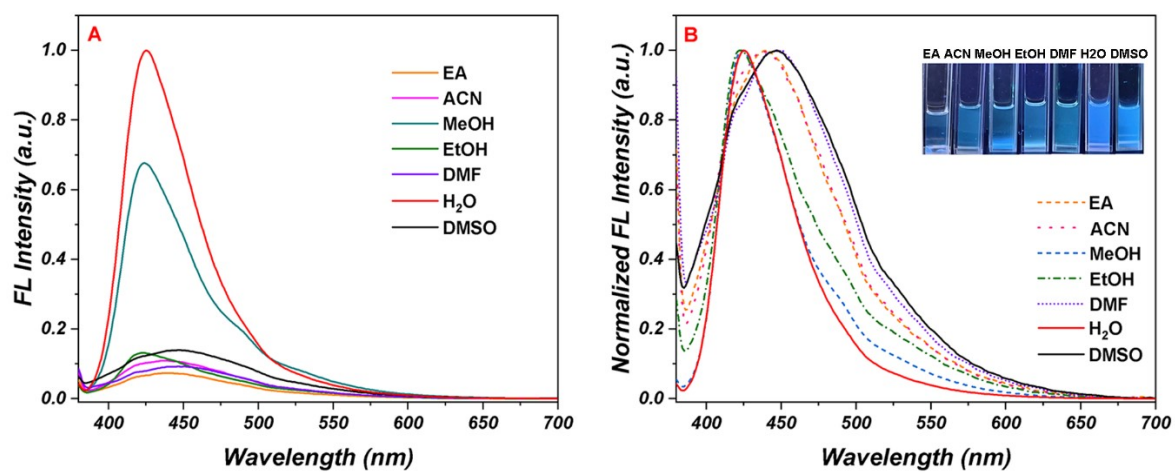

**Figure S6.** (A) The emission spectra and (B) normalized emission spectra of APDP-CDs in different solvents. Inset: fluorescence photos of APDP-CDs in different solvents. [APDP-CDs] = 0.039 mg/mL,  $\lambda_{\text{ex}} = 370$  nm.



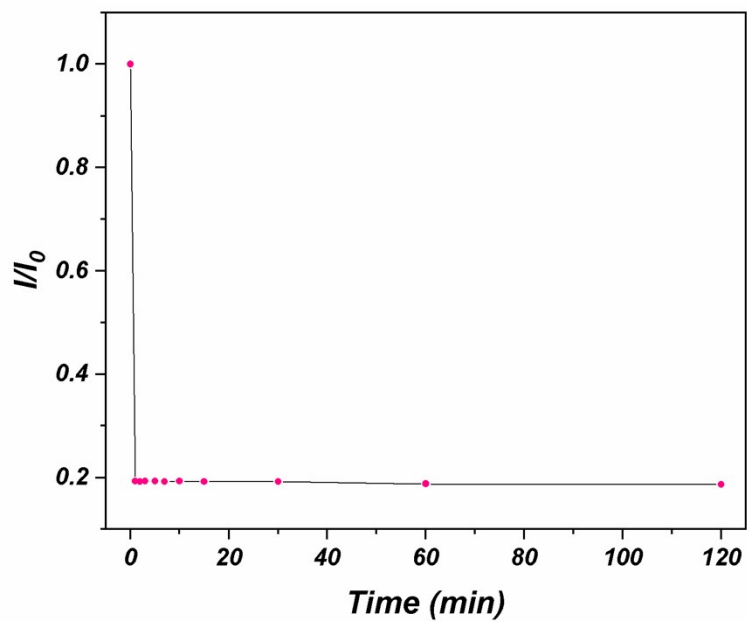

**Figure S7.** The relative fluorescence intensity spectra showing  $\text{Cr}_2\text{O}_7^{2-}$  mediated quenching of the fluorescence of APDP-CDs with respect to time,  $[\text{Cr}_2\text{O}_7^{2-}] = 1.0 \text{ mM}$ ,  $[\text{APDP-CDs}] = 0.039 \text{ mg/mL}$ ,  $\lambda_{\text{ex}} = 370 \text{ nm}$ .

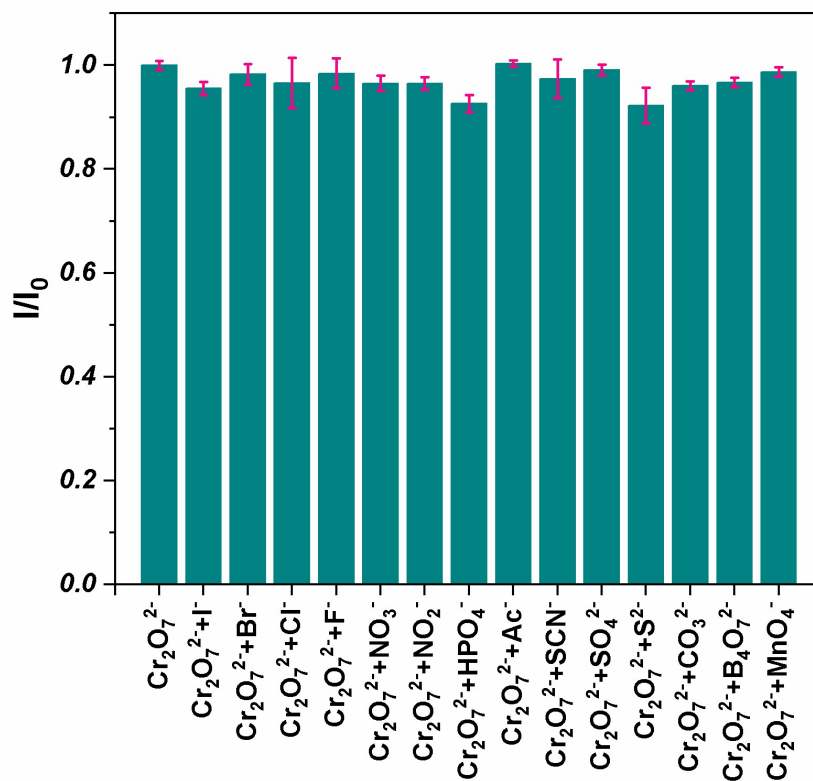

**Figure S8.** The relative fluorescence intensity spectra of APDP-CDs-Cr<sub>2</sub>O<sub>7</sub><sup>2-</sup> system in the presence of various analytes, respectively. Measurement conditions: [APDP-CDs] = 0.039 mg/mL, [Cr<sub>2</sub>O<sub>7</sub><sup>2-</sup> & interfering anions] = 100 μM, λ<sub>ex</sub> = 370 nm.

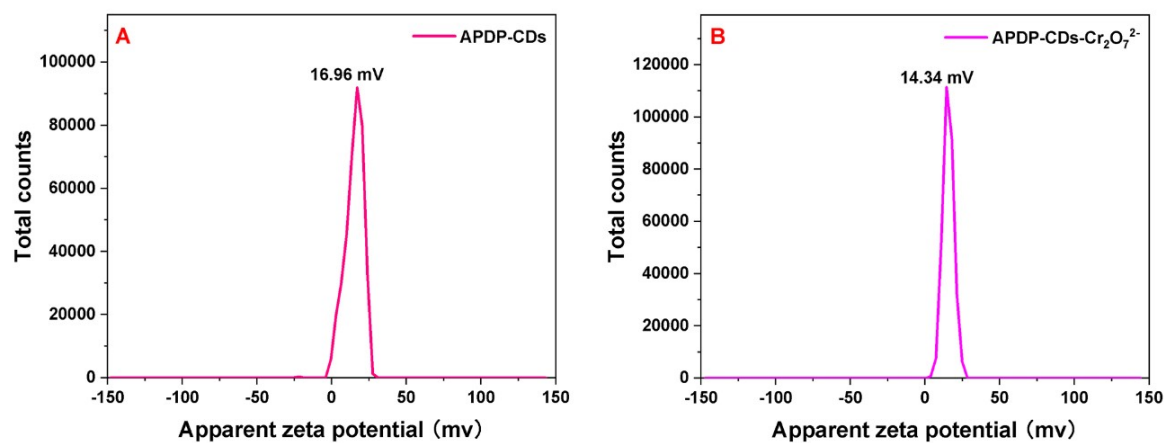

**Figure S9.** The zeta potential values for (A) APDP-CDs and (B) APDP-CDs-Cr<sub>2</sub>O<sub>7</sub><sup>2-</sup> (in the presence of Cr<sub>2</sub>O<sub>7</sub><sup>2-</sup>), respectively. [APDP-CDs] = 0.039 mg/mL, [Cr<sub>2</sub>O<sub>7</sub><sup>2-</sup>] = 1 mM.

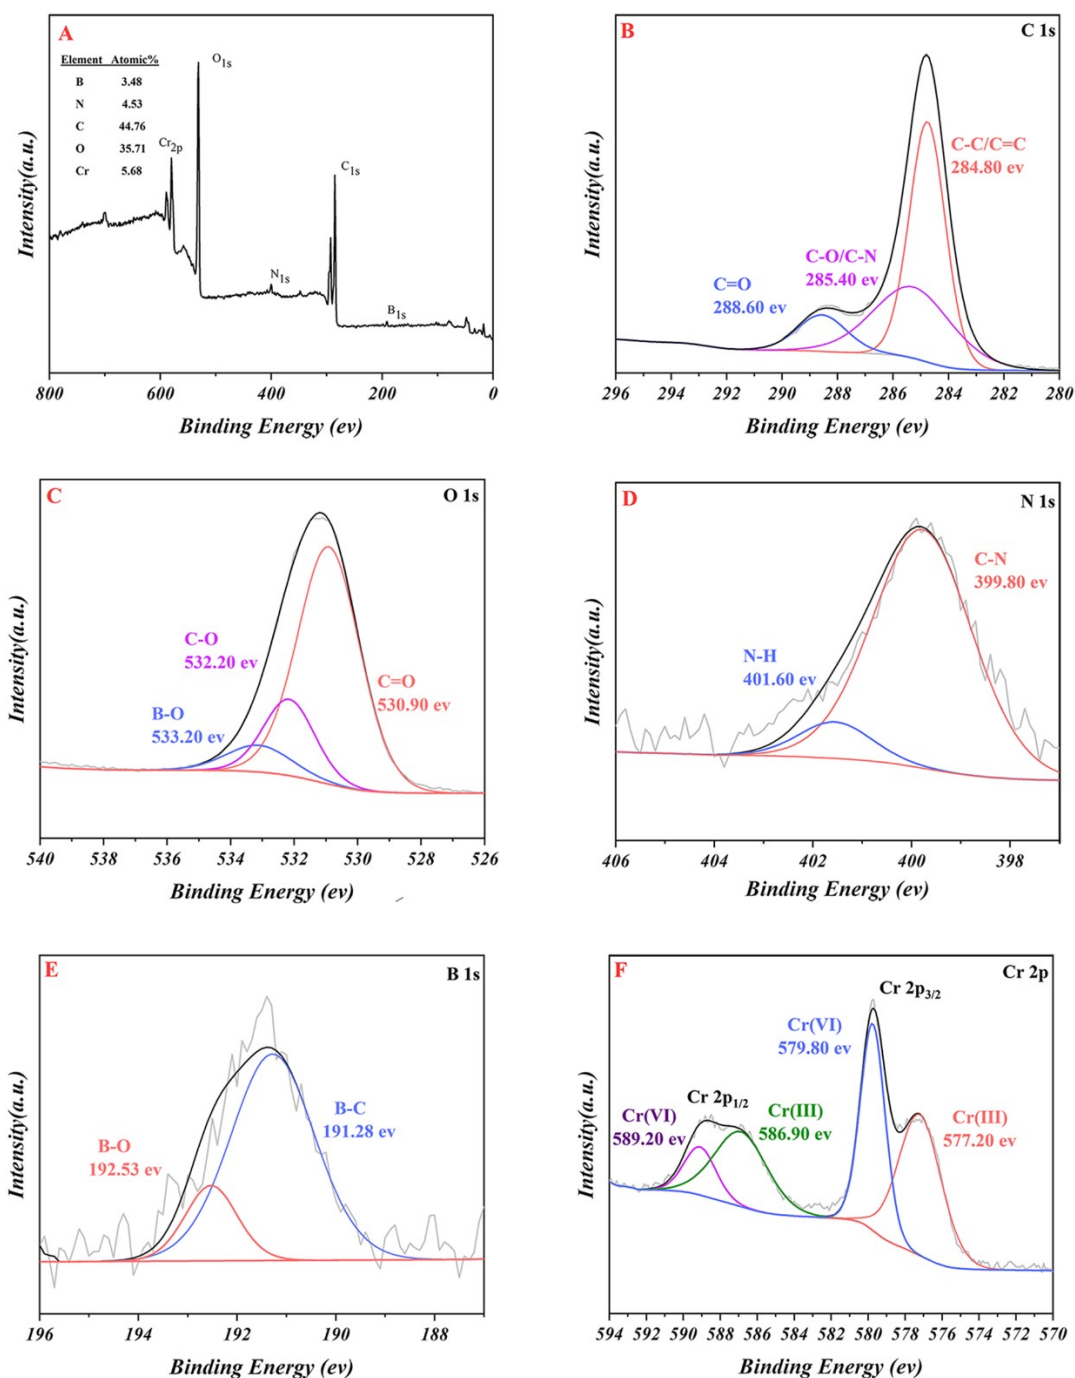

**Figure S10.** (A) Broad range XPS spectra of APDP-CDs-Cr<sub>2</sub>O<sub>7</sub><sup>2-</sup>. Elemental analysis of (B) C 1s, (C) O 1s, (D) N 1s, (E) B 1s and (F) Cr 2p. XPS analysis has been done using the vacuum dried solid.

**Table S1.** The comparison of different materials for  $\text{Cr}_2\text{O}_7^{2-}$  determination.

| Materials                                                 | Method of detection | Limit of detection                   | Linear range                              | QYs          | Reference           |
|-----------------------------------------------------------|---------------------|--------------------------------------|-------------------------------------------|--------------|---------------------|
| N-GQDs                                                    | fluorescence        | 40 nM                                | 0-140 $\mu\text{M}$                       | 18.6%        | 1                   |
| CD-PEI                                                    | FAAS strategy       | 0.21 $\mu\text{g/L}$                 | –                                         | –            | 2                   |
| –                                                         | chromatography      | $\sim 0.5 \mu\text{g/L}$             | –                                         | –            | 4                   |
| –                                                         | UA-DES-ELPME-FAAS   | 5.5 $\mu\text{g/L}$                  | –                                         | –            | 6                   |
| M-Cdots                                                   | fluorescence        | 0.67 $\mu\text{M}$                   | 2-100 $\mu\text{M}$                       | 4.9%         | 11                  |
| CDs                                                       | fluorescence        | 0.14 $\mu\text{M}$                   | 0.1-5 $\mu\text{M}$                       | –            | 12                  |
|                                                           | Colorimetric        | 0.41 $\mu\text{M}$                   | 0-25 $\mu\text{M}$                        |              |                     |
| BNCDs                                                     | fluorescence        | 0.41 $\mu\text{M}$                   | 0-100 $\mu\text{M}$                       | –            | 37                  |
| Ag-CDs                                                    | fluorescence        | 0.0437 $\mu\text{M}$                 | 0.1-0.6 $\mu\text{M}$                     | –            | 40                  |
| chemosensor                                               | fluorescence        | 0.175 $\mu\text{M}$                  | 1-500 $\mu\text{M}$                       | –            | 41                  |
| CTAB-LaHAP@PANI                                           | adsorption          | 98.20 mg/g                           | –                                         | –            | 42                  |
| Chitosan cross-linked hydrous cerium-copper oxide (CHCCO) | adsorption          | 297.62 mg/g                          | 5-400 mg/L                                | –            | 43                  |
| <b>APDP-CDs</b>                                           | <b>fluorescence</b> | <b>19 nM</b>                         | <b>300 nM-80 <math>\mu\text{M}</math></b> | <b>37.6%</b> | <b>Present work</b> |
|                                                           |                     | <b>0.17 <math>\mu\text{M}</math></b> | <b>80 <math>\mu\text{M}</math> -1 mM</b>  |              |                     |

**Table S2.** The lifetime of APDP-CDs in the absence and presence of 1 mM  $\text{Cr}_2\text{O}_7^{2-}$ , respectively.

| <b>Moiety</b>                             | <b><math>\tau_1</math></b><br><b>ns</b> | <b><math>\alpha_1</math></b><br><b>(%)</b> | <b><math>\tau_2</math></b><br><b>ns</b> | <b><math>\alpha_2</math></b><br><b>(%)</b> | <b><math>\tau_3</math></b><br><b>ns</b> | <b><math>\alpha_3</math></b><br><b>(%)</b> | <b><math>\tau_{av}</math></b><br><b>ns</b> |
|-------------------------------------------|-----------------------------------------|--------------------------------------------|-----------------------------------------|--------------------------------------------|-----------------------------------------|--------------------------------------------|--------------------------------------------|
| APDP-CDs                                  | 1.8823                                  | 1.33                                       | 4.124                                   | 95.07                                      | 17.27                                   | 3.61                                       | 5.91                                       |
| APDP-CDs-<br>$\text{Cr}_2\text{O}_7^{2-}$ | 0.41                                    | 0.01                                       | 3.5844                                  | 92.49                                      | 8.4965                                  | 7.5                                        | 4.38                                       |

The average lifetime ( $\tau_{av}$ ) has been calculated using the following equation,

$$\tau_{av} = \frac{\sum_{n=1}^x \alpha_n \tau_n^2}{\sum_{n=1}^x \alpha_n \tau_n} \quad (\text{S2})$$

## References

1. F. Cai, X. Liu, S. Liu, H. Liu and Y. Huang, *RSC Advance*, 2014, **4**, 52016-52022.
2. Y. Liu, J. Hu, Y. Li, H.-P. Wei, X.-S. Li, X.-H. Zhang, S.-M. Chen and X.-Q. Chen, *Talanta*, 2015, **134**, 16-23.
4. E. Yilmaz and M. Soylak, *Talanta*, 2016, **160**, 680-685.
6. H. Hagendorfer and W. Goessler, *Talanta*, 2008, **76**, 656-661.
11. S.-N. Zhang, L.-L. Wang, T.-T. Xiao, M. Zhang and X.-B. Yin, *Analytical and Bioanalytical Chemistry*, 2024, **416**, 3985-3996.
12. G. Qiao, D. Lu, Y. Tang, J. Gao and Q. Wang, *Dyes and Pigments*, 2019, **163**, 102-110.
27. L. Wang, J. S. Chung and S. H. Hur, *Dyes and Pigments*, 2019, **171**, 107752.
29. L. Wang, J. Jana, J. S. Chung and S. H. Hur, *Dyes and Pigments*, 2021, **186**, 109028.
37. M. Jia, L. Peng, M. Yang, H. Wei, M. Zhang and Y. Wang, *Carbon*, 2021, **182**, 42-50.
40. C. Zhao, X. Li, C. Cheng and Y. Yang, *Microchemical Journal*, 2019, 147, 183-190.
41. B. Hu, Y. Ma and N. Wang, *Microchemical Journal*, 2020, 157, 104855.
42. R. Priyadharshini, S. S. Elanchezhyan, K. Ramkumar and S. Meenakshi, *Journal of Molecular Liquids*, 2024, 409, 125529.
43. A. Ghosh, S. Mondal, S. Kanrar, A. Srivastava, M. D. Pandey, U. C. Ghosh and P. Sasikumar, *International Journal of Biological Macromolecules*, 2024, 276, 134016.
